# Supplementary material for: TnseqDiff: identification of conditionally essential genes in transposon sequencing studies
Source: PubMed Central journal article supplement (PMC5500955; doi:10.1186/s12859-017-1745-2), 2017-07-06
Supplement: 12859_2017_1745_MOESM1_ESM.pdf [file 12859_2017_1745_MOESM1_ESM.pdf]

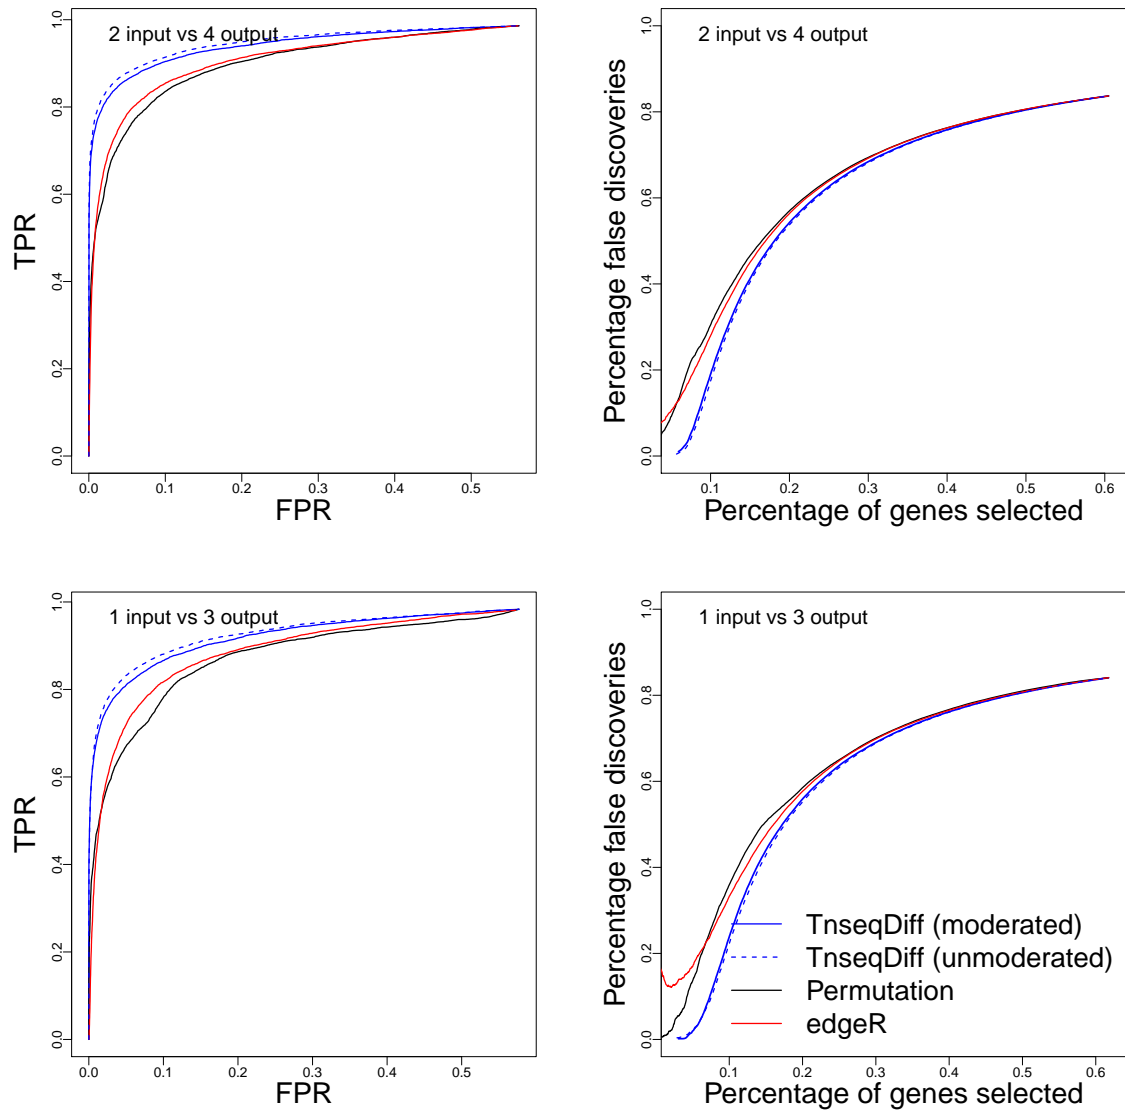

Figure1S: Evaluate the model performance for identifying conditionally essential genes. ROC curves (left) where  $y$  axis is the true positive rate and  $x$  axis is the false positive rate and False discovery curves (right) where  $y$  axis is the percentage false discoveries and  $x$  axis is the percentage of selected genes. Four methods applied to 20 simulated datasets and results are summarized over all datasets.
